# Supplementary material for: Psychedelics promote plasticity by directly binding to BDNF receptor TrkB
Source: PubMed Central journal article supplement (PMC10244169; doi:10.1038/s41593-023-01316-5), 2023-06-05
Supplement: 41593_2023_1316_MOESM1_ESM.pdf [file 41593_2023_1316_MOESM1_ESM.pdf]

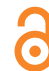

---

# Psychedelics promote plasticity by directly binding to BDNF receptor TrkB

---

In the format provided by the authors and unedited

**Supplementary Table 3.** Simulated systems. The table lists the variants of TM TrkB dimers embedded in POPC-CHOL lipid membranes, mole percentage of cholesterol ( $\rho_{\text{CHOL}}$ ), the number of POPC ( $N_{\text{POPC}}$ ) and cholesterol ( $N_{\text{CHOL}}$ ) molecules in a membrane, the number of independent simulation repeats ( $N_{\text{sim}}$ ), and the simulation length per repeat ( $t_{\text{sim}}$ ). “WT”, “Y433F.homo”, and “V437A.homo” refer in respective order to the wild-type and homozygous Y433F and V437A variants of a TrkB TM dimer (residues 427-459). LSD, LSD<sup>+</sup>: psychoactive (+)-LSD (in a 5R,8R configuration) in a neutral and protonated form. PSI, PSI<sup>+</sup>: psilocin in a neutral and protonated form. Lisuride, Lisuride<sup>+</sup>: lisuride in a neutral and protonated form. CAR: cabergoline in a neutral form (pKa = 6.22). DHE: dihydroergotamine in a neutral form (pKa = 6.75).

| System name            | Protein variant | Drug type             | $\rho_{\text{CHOL}}$ (mol%) | $N_{\text{POPC}}$ | $N_{\text{CHOL}}$ | $N_{\text{sim}}$ | $t_{\text{sim}}$ ( $\mu\text{s}$ ) |
|------------------------|-----------------|-----------------------|-----------------------------|-------------------|-------------------|------------------|------------------------------------|
| System 1 <sup>#</sup>  | WT              | LSD                   | 20                          | 112               | 28                | 100              | 1                                  |
| System 2 <sup>∇</sup>  | WT              | LSD                   | 20                          | 112               | 28                | 20               | 2                                  |
| System 3 <sup>∇</sup>  | WT              | LSD <sup>+</sup>      | 20                          | 112               | 28                | 20               | 2                                  |
| System 4 <sup>∇</sup>  | WT              | PSI                   | 20                          | 112               | 28                | 20               | 2                                  |
| System 5 <sup>∇</sup>  | WT              | PSI <sup>+</sup>      | 20                          | 112               | 28                | 20               | 2                                  |
| System 6 <sup>∇</sup>  | WT              | Lisuride              | 20                          | 112               | 28                | 20               | 2                                  |
| System 7 <sup>∇</sup>  | WT              | Lisuride <sup>+</sup> | 20                          | 112               | 28                | 20               | 2                                  |
| System 8 <sup>∇</sup>  | WT              | CAR                   | 20                          | 112               | 28                | 20               | 2                                  |
| System 9 <sup>∇</sup>  | WT              | DHE                   | 20                          | 112               | 28                | 20               | 2                                  |
| System 10 <sup>∇</sup> | Y433F           | LSD                   | 20                          | 112               | 28                | 20               | 2                                  |
| System 11 <sup>∇</sup> | V437A           | LSD                   | 20                          | 112               | 28                | 20               | 2                                  |
| System 12 <sup>∇</sup> | Y433F           | LSD <sup>+</sup>      | 20                          | 112               | 28                | 20               | 2                                  |
| System 13 <sup>∇</sup> | V437A           | LSD <sup>+</sup>      | 20                          | 112               | 28                | 20               | 2                                  |
| System 14 <sup>∇</sup> | Y433F           | PSI <sup>+</sup>      | 20                          | 112               | 28                | 20               | 2                                  |
| System 15 <sup>∇</sup> | V437A           | PSI <sup>+</sup>      | 20                          | 112               | 28                | 20               | 2                                  |
| System 16 <sup>†</sup> | WT              | LSD                   | 20                          | 112               | 28                | 1                | 0.06                               |
| System 17 <sup>†</sup> | Y433F           | LSD                   | 20                          | 112               | 28                | 1                | 0.06                               |
| System 18 <sup>†</sup> | V437A           | LSD                   | 20                          | 112               | 28                | 1                | 0.06                               |
| System 19 <sup>†</sup> | WT              | LSD <sup>+</sup>      | 20                          | 112               | 28                | 1                | 0.06                               |
| System 20 <sup>†</sup> | Y433F           | LSD <sup>+</sup>      | 20                          | 112               | 28                | 1                | 0.06                               |
| System 21 <sup>†</sup> | V437A           | LSD <sup>+</sup>      | 20                          | 112               | 28                | 1                | 0.06                               |
| System 22 <sup>†</sup> | WT              | PSI                   | 20                          | 112               | 28                | 1                | 0.06                               |
| System 23 <sup>†</sup> | WT              | PSI <sup>+</sup>      | 20                          | 112               | 28                | 1                | 0.06                               |
| System 24 <sup>†</sup> | Y433F           | PSI <sup>+</sup>      | 20                          | 112               | 28                | 1                | 0.06                               |
| System 25 <sup>†</sup> | V437A           | PSI <sup>+</sup>      | 20                          | 112               | 28                | 1                | 0.06                               |
| System 26 <sup>†</sup> | WT              | Lisuride              | 20                          | 112               | 28                | 1                | 0.06                               |
| System 27 <sup>†</sup> | WT              | Lisuride <sup>+</sup> | 20                          | 112               | 28                | 1                | 0.06                               |
| System 28 <sup>†</sup> | WT              | CAR                   | 20                          | 112               | 28                | 1                | 0.16                               |
| System 29 <sup>†</sup> | WT              | DHE                   | 20                          | 112               | 28                | 1                | 0.06                               |
| System 30 <sup>§</sup> | WT              | -                     | 40                          | 90                | 60                | 10               | 1                                  |
| System 31 <sup>§</sup> | WT              | LSD                   | 40                          | 90                | 60                | 10               | 1                                  |
| System 32 <sup>§</sup> | WT              | LSD <sup>+</sup>      | 40                          | 90                | 60                | 10               | 1                                  |
| System 33 <sup>§</sup> | WT              | PSI <sup>+</sup>      | 40                          | 90                | 60                | 10               | 1                                  |
| System 34 <sup>§</sup> | WT              | Lisuride <sup>+</sup> | 40                          | 90                | 60                | 10               | 1                                  |

# Simulations to explore LSD binding site and mode.

∇ Simulations to optimize the binding modes of each drug in the wild type and mutated TM TrkB dimers.

† FEP/HREX (free energy) simulations to estimate the drug binding affinities.

§ Simulations to explore the effect of cholesterol and the drugs on the conformation of the protein.
